# Supplementary material for: Gene co-expression regulatory network analysis identifies novel regulators in light signaling pathways in Arabidopsis
Source: Frontiers journal article supplement (doi:10.3389/fphbi.2025.1597248), 2025-07-08
Supplement: Table_2.xlsx [file Table_2.xlsx]

## Sheet: Sheet2
List of hub genes in honeydew1 module
Locus	geneSymbol	Gene.Model.Description	MM.honeydew1	p.MM.honeydew1	GS.datTraits.Dark.4.days	p.GS.datTraits.Dark.4.days	moduleColor
AT5G03280	EIN2	Involved in ethylene signal transduction. Acts downstream of CTR1. Positively regulates ORE1 and negatively regulates mir164A,B,C to regulate leaf senescence. A maternally expressed imprinted gene. Mutations in ein2 block ethylene stimulation of flavonol synthesis. The mRNA is cell-to-cell mobile.	0.917626	4.18e-24	0.586342	1.32e-06	honeydew1
AT1G72290	WSCP	Encodes a Kunitz-protease inhibitor, a water-soluble chlorophyll protein involved in herbivore resistance activation.	0.834973	3.75e-16	0.561289	4.57e-06	honeydew1
AT1G34110	AT1G34110	Leucine-rich receptor-like protein kinase family protein;(source:Araport11)	0.909256	5.61e-23	0.482561	0.000124968	honeydew1
AT5G03340	CDC48E	ATPase, AAA-type, CDC48 protein;(source:Araport11)	0.857016	9.23e-18	0.46704	0.000219126	honeydew1
AT1G05380	AT1G05380	Acyl-CoA N-acyltransferase with RING/FYVE/PHD-type zinc finger protein;(source:Araport11)	0.850403	2.98e-17	0.45363	0.000348539	honeydew1
AT1G20790	AT1G20790	F-box family protein;(source:Araport11)	0.933808	1.14e-26	0.440384	0.000541236	honeydew1
AT5G53660	GRF7	Growth regulating factor encoding transcription activator. One of the nine members of a GRF gene family, containing nuclear targeting domain. Involved in leaf development and expressed in shoot and flower.	0.842522	1.12e-16	0.434099	0.000662853	honeydew1
AT5G63650	SRK2H	encodes a member of SNF1-related protein kinases (SnRK2) whose activity is activated by ionic (salt) and non-ionic (mannitol) osmotic stress.	0.825458	1.58e-15	0.4319	0.000710912	honeydew1
AT2G21910	CYP96A5	member of CYP96A	0.929491	6.3e-26	0.430903	0.000733714	honeydew1
AT5G49690	UGT91C1	UDP-Glycosyltransferase superfamily protein;(source:Araport11)	0.912545	2.09e-23	0.416693	0.00113905	honeydew1
AT1G44830	ERF014	Encodes a nuclear-localized member of the DREB subfamily A-5 of ERF/AP2 transcription factor family. The protein contains one AP2 domain. There are 15 members in this subfamily including RAP2.1, RAP2.9 and RAP2.10. Overexpression in cultured cells results in an increase in pectin deposition.ERF014 differentially regulates responses to bacterial and fungal pathogens.	0.871159	6.08e-19	0.410015	0.0013915	honeydew1
AT5G39650	AT5G39650	Target promoter of the male germline-specific transcription factor DUO1. Knock down mutants result in an aborted seed phenotype that is transmitted through the male.	0.86737	1.3e-18	0.404122	0.00165481	honeydew1
AT5G14360	AT5G14360	Ubiquitin-like superfamily protein;(source:Araport11)	0.881334	7e-20	0.395801	0.00210246	honeydew1
AT1G21980	PIP5K1	Type I phosphatidylinositol-4-phosphate 5-kinase. Preferentially phosphorylates PtdIns4P. Induced by water stress and abscisic acid in Arabidopsis thaliana. Expressed in procambial cells of leaves, flowers and roots. A N-terminal Membrane Occupation and Recognition Nexus (MORN)affects enzyme activity and distribution.	0.857145	9.02e-18	0.395257	0.00213519	honeydew1
AT5G22310	AT5G22310	trichohyalin-like protein;(source:Araport11)	0.891779	6.12e-21	0.395235	0.00213653	honeydew1
AT5G09370	AT5G09370	Bifunctional inhibitor/lipid-transfer protein/seed storage 2S albumin superfamily protein;(source:Araport11)	0.832808	5.24e-16	0.393039	0.00227335	honeydew1
AT3G18530	AT3G18530	ARM repeat superfamily protein;(source:Araport11)	0.862169	3.55e-18	0.385918	0.0027723	honeydew1
AT1G60060	AT1G60060	Serine/threonine-protein kinase WNK (With No Lysine)-like protein;(source:Araport11)	0.844493	8.13e-17	0.38582	0.00277976	honeydew1
AT3G14230	RAP2-2	encodes a member of the ERF (ethylene response factor) subfamily B-2 of ERF/AP2 transcription factor family (RAP2.2). The protein contains one AP2 domain. There are 5 members in this subfamily including RAP2.2 AND RAP2.12.	0.899192	9.29e-22	0.383693	0.002947	honeydew1
AT1G64660	MGL	Encodes a functional methionine gamma-lyase, a cytosolic enzyme catalyzes the degradation of methionine into methanethiol, alpha-ketobutyrate and ammonia. The catabolism of excess methionine is important to methionine homeostasis. The mRNA is cell-to-cell mobile.	0.904472	2.21e-22	0.381462	0.00313188	honeydew1
AT2G34315	AT2G34315	avirulence induced family protein;(source:Araport11)	0.855877	1.13e-17	0.381458	0.00313224	honeydew1
AT2G39350	ABCG1	Belongs to a clade of five Arabidopsis thaliana ABCG half-transporters that are required for synthesis of an effective suberin barrier in roots and seed coats (ABCG2, ABCG6, and ABCG20) and for synthesis of an intact pollen wall (ABCG1 and ABCG16).	0.885733	2.58e-20	0.381251	0.00314993	honeydew1
AT5G48890	LATE	Encodes a C(2) H(2) -type zinc-finger transcriptional regulator and is expressed in the leaf vasculature and the vegetative shoot apical meristem and controls the transition to flowering.	0.845134	7.3e-17	0.379915	0.00326611	honeydew1
AT1G80570	FBL14	RNI-like superfamily protein;(source:Araport11)	0.877414	1.65e-19	0.377782	0.00345946	honeydew1
AT4G10240	BBX23	B-box zinc finger family protein;(source:Araport11)	0.856277	1.06e-17	0.376802	0.00355167	honeydew1
AT5G06570	AT5G06570	alpha/beta-Hydrolases superfamily protein;(source:Araport11)	0.852113	2.21e-17	0.366215	0.00469514	honeydew1
AT4G10020	HSD5	Encodes a putative hydroxysteroid dehydrogenase (HSD). Genes that encode HSD include: At5g50600 and At5g50700 (HSD1), At3g47350(HSD2), At3g47360(HSD3), At5g50590 and At5g50690(HSD4), At5g50770(HSD6) (Plant Cell Physiology 50:1463). Two copies of HSD1 and HSD4 exist due to a gene duplication event. In Plant Physiology 145:87, At5g50690 is HSD7, At4g10020 is HSD5.	0.937142	2.8e-27	0.365743	0.004753	honeydew1
AT2G22680	AT2G22680	Zinc finger (C3HC4-type RING finger) family protein;(source:Araport11)	0.910618	3.74e-23	0.365395	0.004796	honeydew1
AT4G35190	LOG5	Putative lysine decarboxylase family protein;(source:Araport11)	0.875794	2.33e-19	0.360736	0.00540563	honeydew1
AT5G55290	VHA-E1	ATPase, V0 complex, subunit E;(source:Araport11)	0.86165	3.91e-18	0.360119	0.00549125	honeydew1
AT3G29180	AT3G29180	DUF1336 family protein (DUF1336);(source:Araport11)	0.873748	3.57e-19	0.353532	0.00648228	honeydew1
AT2G39705	RTFL8	ROTUNDIFOLIA like 8;(source:Araport11)	0.922104	9.29e-25	0.33924	0.00918517	honeydew1
AT4G01610	CATHB3	Encodes a capase involved in stress induced cell death. Activity detected in leaf and cell culture.	0.904485	2.21e-22	0.338708	0.0093023	honeydew1
AT2G40970	MYBC1	Homeodomain-like superfamily protein;(source:Araport11)	0.879269	1.1e-19	0.337511	0.0095707	honeydew1
AT1G15840	AT1G15840	hypothetical protein;(source:Araport11)	0.911527	2.84e-23	0.334059	0.0103825	honeydew1
AT4G37870	PCKA	Encodes a phosphoenolpyruvate carboxykinase that localizes to the cytosol.	0.851886	2.3e-17	0.329126	0.0116459	honeydew1
AT5G54190	PORA	light-dependent NADPH:protochlorophyllide oxidoreductase A	0.87024	7.33e-19	0.328605	0.0117867	honeydew1
AT1G66780	DTX8	MATE efflux family protein;(source:Araport11)	0.86984	7.94e-19	0.324382	0.0129837	honeydew1
AT5G64260	EXL2	EXORDIUM like 2;(source:Araport11)	0.881029	7.48e-20	0.322867	0.0134377	honeydew1
AT2G25430	AT2G25430	AP180 N-terminal homology domain, TPLATE complex protein involved in clathrin-mediated endocytosis.	0.829215	9.04e-16	0.317796	0.0150588	honeydew1
AT2G37678	FHY1	Positive regulator of photomorphogenesis in far-red light. Most abundant in young seedlings in the dark. Downregulated in the light and older as plants develop. Localized in the nucleus and the cytoplasm. Nuclear localization strongest in the dark. Degraded through the 26S proteasome. Regulated by PHYA. It is specifically required for the light-regulated nuclear accumulation of phyA ( but not phy…	0.826389	1.37e-15	0.317599	0.0151249	honeydew1
AT1G60140	TPS10	Encodes an enzyme putatively involved in trehalose biosynthesis. The protein has a trehalose synthase (TPS)-like domain that may or may not be active as well as a trehalose phosphatase (TPP)-like domain.	0.871968	5.16e-19	0.315385	0.0158865	honeydew1
AT5G51210	OL3	Encodes oleosin3, a protein found in oil bodies, involved in seed lipid accumulation.	0.900904	5.89e-22	0.311908	0.0171487	honeydew1
AT1G67600	AT1G67600	Acid phosphatase/vanadium-dependent haloperoxidase-related protein;(source:Araport11)	0.800545	4.63e-14	0.311388	0.0173447	honeydew1
AT2G46990	IAA20	Encodes a member of the Aux/IAA family of proteins implicated in auxin signaling. IAA20 lacks the conserved degron (domain II) found in many family members, and IAA20 fusion proteins are stable in Arabidopsis seedlings. IAA20 transcripts are induced by auxin treatment, and overexpression of IAA20 leads to defects in gravitropism, root development, root meristem maintenance, etiolation, and cotyle…	0.848304	4.28e-17	0.307706	0.018787	honeydew1
AT1G23870	TPS9	Encodes an enzyme putatively involved in trehalose biosynthesis. The protein has a trehalose synthase (TPS)-like domain that may or may not be active as well as a trehalose phosphatase (TPP)-like domain. The mRNA is cell-to-cell mobile.	0.804028	2.97e-14	0.306713	0.019193	honeydew1
AT5G08130	BIM1	Encodes a basic helix-loop-helix (bHLH) family protein BIM1 (BES1-INTERACTING MYC-LIKE 1), involved in brassinosteroid signaling. It synergistically interacts with BES1 to bind to E box sequences (CANNTG). Positively modulates the shade avoidance syndrome in Arabidopsis seedlings.	0.869486	8.53e-19	0.305694	0.0196177	honeydew1
AT5G67150	AT5G67150	HXXXD-type acyl-transferase family protein;(source:Araport11)	-0.83862	2.11e-16	-0.310392	0.0177251	honeydew1
AT5G10250	DOT3	Encodes a protein with an N-terminal BTB/POZ domain and a C-terminal NPH3 family domain. dot3 mutants have defects in shoot and primary root growth and produce an aberrant parallel venation pattern in juvenile leaves.	-0.890759	7.85e-21	-0.313499	0.0165608	honeydew1
AT5G63060	AT5G63060	Sec14p-like phosphatidylinositol transfer family protein;(source:Araport11)	-0.933217	1.45e-26	-0.313795	0.0164534	honeydew1
AT5G64667	IDL2	Similar to Inflorescence deficient in abscission (IDA). Involved in floral organ abscission.	-0.863257	2.89e-18	-0.320347	0.0142237	honeydew1
AT3G06160	AT3G06160	AP2/B3-like transcriptional factor family protein;(source:Araport11)	-0.846236	6.07e-17	-0.323854	0.0131403	honeydew1
AT1G22690	GASA9	Gibberellin-regulated family protein;(source:Araport11)	-0.900455	6.64e-22	-0.327757	0.012019	honeydew1
AT3G03770	AT3G03770	Leucine-rich repeat protein kinase family protein;(source:Araport11)	-0.925787	2.52e-25	-0.329635	0.0115096	honeydew1
AT3G23410	FAO3	Encodes a fatty alcohol oxidase.	-0.912769	1.95e-23	-0.332188	0.0108471	honeydew1
AT1G20470	AT1G20470	SAUR-like auxin-responsive protein family;(source:Araport11)	-0.824744	1.75e-15	-0.338095	0.00943892	honeydew1
AT4G18490	AT4G18490	hypothetical protein;(source:Araport11)	-0.858985	6.43e-18	-0.338394	0.00937213	honeydew1
AT1G70580	GGAT2	Encodes a protein with glyoxylate aminotransferase activity. It can act on a number of different small substrates and amino acids in vitro.	-0.903333	3.04e-22	-0.357638	0.0058477	honeydew1
AT1G28610	AT1G28610	GDSL-motif esterase/acyltransferase/lipase. Enzyme group with broad substrate specificity that may catalyze acyltransfer or hydrolase reactions with lipid and non-lipid substrates.	-0.958419	3.52e-32	-0.360716	0.00540838	honeydew1
AT2G47370	AT2G47370	Calcium-dependent phosphotriesterase superfamily protein;(source:Araport11)	-0.908612	6.78e-23	-0.360849	0.00539005	honeydew1
AT1G13650	AT1G13650	hypothetical protein;(source:Araport11)	-0.905514	1.65e-22	-0.363157	0.00508077	honeydew1
AT2G23600	ACL	Encodes a protein shown to have carboxylesterase activity, methyl salicylate esterase activity, methyl jasmonate esterase activity, and methyl IAA esterase activity in vitro. MES2 appears to be involved in MeSA hydrolysis in planta. This protein does not act on MeGA4, or MEGA9 in vitro and has been show to be capable of hydrolyzing methyl ester nicotinate back to nicotinate.	-0.88856	1.33e-20	-0.363442	0.00504367	honeydew1
AT5G24150	SQE5	squalene monooxygenase gene homolog	-0.887715	1.63e-20	-0.364938	0.00485298	honeydew1
AT2G17340	AT2G17340	pantothenate kinase;(source:Araport11)	-0.90932	5.5e-23	-0.370853	0.0041594	honeydew1
AT2G15020	AT2G15020	hypothetical protein;(source:Araport11)	-0.886866	1.98e-20	-0.374114	0.00381577	honeydew1
AT5G16530	PIN5	Encodes PIN5, an atypical member of the PIN family. PIN5 is a functional auxin transporter that is required for auxin-mediated development. PIN5 does not have a direct role in cell-to-cell transport but regulates intracellular auxin homeostasis and metabolism. PIN5 localizes, unlike other characterized plasma membrane PIN proteins, to endoplasmic reticulum (ER), presumably mediating auxin flow fr…	-0.912476	2.13e-23	-0.382383	0.00305434	honeydew1
AT1G73870	COL7	B-box type zinc finger protein with CCT domain-containing protein;(source:Araport11)	-0.871965	5.16e-19	-0.385081	0.00283684	honeydew1
AT4G17050	UGLYAH	Encodes a protein with ureidoglycine aminohydrolase activity.	-0.85948	5.87e-18	-0.400863	0.00181881	honeydew1
AT5G44050	DTX28	MATE efflux family protein;(source:Araport11)	-0.894284	3.29e-21	-0.40166	0.0017774	honeydew1
AT1G14300	AT1G14300	ARM repeat superfamily protein;(source:Araport11)	-0.879438	1.06e-19	-0.42761	0.000813831	honeydew1
AT2G24190	AT2G24190	Encodes an aldehyde reductase that catalyzes the reduction of the aldehyde carbonyl groups on saturated and alpha,beta-unsaturated aldehydes with more than 5 carbons in vitro. In addition, this enzyme can reduce methylglyoxal in vitro. It is believed that this enzyme localizes to the cytosol like the closely related protein encoded by AT3G61220.	-0.916388	6.24e-24	-0.436505	0.000613637	honeydew1
AT5G67370	AT5G67370	DUF1230 family protein (DUF1230);(source:Araport11)	-0.92663	1.85e-25	-0.446085	0.000448828	honeydew1
AT5G61270	BHLH72	Basic helix-loop-helix (bHLH) phytochrome interacting factor. Interacts specifically with the far-red light?absorbing Pfr form of phyB through a conserved domain called the active phyB binding motif. Upon light exposure, PIF7 rapidly migrates to intranuclear speckles, where it colocalizes with phyB. Role as negative regulator of phyB-mediated seedling deetiolation.	-0.853131	1.85e-17	-0.473151	0.000176223	honeydew1
AT2G19650	AT2G19650	Cysteine/Histidine-rich C1 domain family protein;(source:Araport11)	-0.858775	6.69e-18	-0.503421	5.62e-05	honeydew1
AT4G17090	BAM3	Encodes a beta-amylase targeted to the chloroplast. Transgenic BMY8 RNAi lines fail to accumulate maltose during cold shock suggesting that maltose accumulation coincides with BMY8 expression. Apart from maltose, the sugar content of the RNAi lines were similar to wildtype (glucose and sucrose unaffected).BAM3 activity declines 2 and 4 days after start of cold stress despite an increase in transc…	-0.882753	5.09e-20	-0.525704	2.26e-05	honeydew1
